# Supplementary material
Source: publisher figshare collection journal article supplement (https://tandf.figshare.com/articles/dataset/_/26183459)
Supplement: Supplementary file 1 [file 1]

## ELECTRONIC SUPPLEMENTAL MATERIAL

### Separating and Identifying Multiple Structural Isomers of 3-hydroxy-3-(3'-hydroxyphenyl)propanoic acid (3,3'-HPPHA)

Mark E. Obrenovich<sup>a,b,c,d</sup>, Ethel Tackie-Yarboi<sup>d</sup>, Isaac T. Schiefer<sup>d,e</sup>, Curtis J. Donskey<sup>f,g</sup>, George E. Jaskiw<sup>h,g\*</sup>

\*Corresponding author: George E. Jaskiw, [gxj5@case.edu](mailto:gxj5@case.edu), VANEOMS, Psychiatry Service 116A, 10701 East Blvd., Cleveland, OH 44106

<https://orcid.org/0000-0001-7168-0822>

<sup>a</sup>Pathology and Laboratory Medicine Service, VA Northeast Ohio Healthcare System (VANEOMS), Cleveland, OH 44106 USA

<sup>b</sup>Research Service, VANEOMS, Cleveland, OH 44106 USA

<sup>c</sup>Department of Chemistry, Case Western Reserve University, Cleveland, OH, 44106 USA

<sup>d</sup>Department of Medicinal and Biological Chemistry, College of Pharmacy and Pharmaceutical Sciences, University of Toledo, Toledo, OH 43614 USA

<sup>e</sup>Center for Drug Design and Development, College of Pharmacy and Pharmaceutical Sciences, University of Toledo, Toledo, OH 43614 USA

<sup>f</sup>Infectious Diseases Service, VANEOMS, OH, 44106 USA

<sup>g</sup>School of Medicine, Case Western Reserve University, Cleveland, OH, 44106 USA

<sup>h</sup>Psychiatry Service, VANEOMS, Cleveland, OH, 44106 USA

| Source | Mouse Status | Sample Status | Isomers Detected | 3',3'-HPHPA (Isomer 1) | 3',4'-HPHPA (Isomer 2) | 4'-HPLA (Isomer 3) | 2',3'-DHHCA (Isomer 4) | 2',4'-DHHCA (Isomer 5) | 3',4'-DHHCA (Isomer 6) | 3',5'-DHHCA (Isomer 7) |
|--------|--------------|---------------|------------------|------------------------|------------------------|--------------------|------------------------|------------------------|------------------------|------------------------|
| Brain  | CON          | U             | 1,2,3,6,7        | √                      | √                      | √                  | ND                     | ND                     | √                      | √                      |
| Brain  | CON          | D             | 1,2,3,4,6,7      | √                      | √                      | √                  | √                      | ND                     | √                      | √                      |
|        |              |               |                  |                        |                        |                    |                        |                        |                        |                        |
| Brain  | GT           | U             | 1,2,3,6,7        | √                      | √                      | √                  | ND                     | ND                     | √                      | √                      |
| Brain  | GT           | D             | 1,2,3,4,6,7      | √                      | √                      | √                  | √                      | ND                     | √                      | √                      |
|        |              |               |                  |                        |                        |                    |                        |                        |                        |                        |
| Urine  | CON          | U             | 1,2,3,5          | √                      | √                      | √                  | ND                     | √                      | ND                     | ND                     |
| Urine  | CON          | D             | 1,2,3,4,5,6      | √                      | √                      | √                  | √                      | √                      | √                      | ND                     |
|        |              |               |                  |                        |                        |                    |                        |                        |                        |                        |
| Urine  | GT           | U             | 1,2,3,4,5,7      | √                      | √                      | √                  | √                      | √                      | ND                     | √                      |
| Urine  | GT           | D             | 1,2,3,4,5,6,7    | √                      | √                      | √                  | √                      | √                      | √                      | √                      |

Supplemental Table 1. Digestion patterns of samples from mice (n = 2) one of which was a control (CON) and the other treated with green tea (GT) in drinking water for 11 days. Isomer abbreviations are as in Figure 1. Standards, consisting of the seven isomers (200 ng/ml) (m/z 181) were injected at the beginning and end of the set of samples. Each sample contained 100 ng/ml deuterium-labeled internal standard mix for peak area integration and quantitation. U – undigested, D – treated with aryl sulfatase and  $\beta$ -glucuronidase before analysis, √ - detected, ND – not detected.
